# Supplementary material for: Bulk crystal growth and characterization of the bismuth ferrite-based material Bi3FeO4(MoO4)2
Source: Royal Society of Chemistry journal article supplement (doi:10.1039/c8ce02137f), 2019-01-01
Supplement: c8ce02137f1.pdf [file c8ce02137f1.pdf]

## Electronic Supplementary Information

### Bulk crystal growth and characterization of bismuth ferrite-based material $\text{Bi}_3\text{FeO}_4(\text{MoO}_4)_2$

Conggang Li,<sup>a</sup> Zeliang Gao,<sup>a</sup> Xiangxin Tian,<sup>a</sup> Junjie Zhang,<sup>a,b</sup> Dianxing Ju,<sup>a</sup> Qian Wu,<sup>a</sup> Weiqun Lu,<sup>a</sup> Youxuan Sun<sup>\*,a</sup>, Deliang Cui<sup>a</sup> and Xutang Tao<sup>\*,a</sup>

<sup>a</sup>State Key Laboratory of Crystal Materials, Shandong University, Jinan 250100, P. R. China.

<sup>b</sup>Materials Science and Technology Division, Oak Ridge National Laboratory, 1 Bethel Valley Rd. Oak Ridge, TN 37831 United States.

1. **Table S1.** Crystal data and structure refinement for BFM.
2. **Figure S1.** The experimental patterns of powder XRD of the residue in the platinum pan after DSC/TGA.
3. **Figure S2.** Photographs of the as-grown  $\text{Bi}_3\text{FeO}_4(\text{MoO}_4)_2$  crystals through spontaneous crystallization with  $\text{MoO}_3$  flux.
4. **Table S2.** Bond Distances ( $\text{\AA}$ ) and Angles (deg.) for  $\text{Bi}_3\text{FeO}_4(\text{MoO}_4)_2$  crystal.
5. **Figure S3.** (a)-(c) Photographs of the indentation morphologies of the  $\text{Bi}_3\text{FeO}_4(\text{MoO}_4)_2$  crystal faces (100), (010) and (001), respectively, from which they are rhombic and regular.
6. **Table S3.** Observed Raman wavenumbers ( $\text{cm}^{-1}$ ) and vibrational assignments for  $\text{Bi}_3\text{FeO}_4(\text{MoO}_4)_2$  crystal.

**Table S1.** Crystal data and structure refinement for BFM.

| Crystal                                     | BFM                                       |
|---------------------------------------------|-------------------------------------------|
| Empirical formula                           | $\text{Bi}_3\text{FeO}_4(\text{MoO}_4)_2$ |
| $M_r$                                       | 1066.67                                   |
| Crystal system                              | Monoclinic                                |
| Space group                                 | $C2/c$ (No. 15)                           |
| Temperature (K)                             | 296                                       |
| $a, b, c$ (Å)                               | 16.927(12), 11.672(12), 5.263(4)          |
| $\beta$ (°)                                 | 107.160(10)                               |
| $V$ (Å <sup>3</sup> )                       | 993.6(15)                                 |
| $Z$                                         | 4                                         |
| D <sub>calcd</sub> , g/cm <sup>3</sup>      | 7.131                                     |
| $\mu$ (mm <sup>-1</sup> )                   | 56.88                                     |
| F (000)                                     | 1820                                      |
| Crystal size (mm)                           | 0.10 × 0.08 × 0.07                        |
| $R_{\text{int}}$                            | 0.092                                     |
| R indices [ $I > 2\sigma(I)$ ] <sup>a</sup> | $R_1=0.0482$ , $wR_2=0.1203$              |
| R indices (all data)                        | $R_1=0.0584$ , $wR_2=0.1254$              |
| Extinction coeff                            | 0.0067(4)                                 |
| GOF on $F^2$                                | 1.018                                     |
| CCDC                                        | 1879545                                   |

$$^a R_1 = \sum ||F_o| - |F_c|| / \sum |F_o|, wR_2 = \left\{ \frac{\sum [w(F_o^2 - F_c^2)^2]}{\sum [w(F_o^2)^2]} \right\}^{1/2}$$

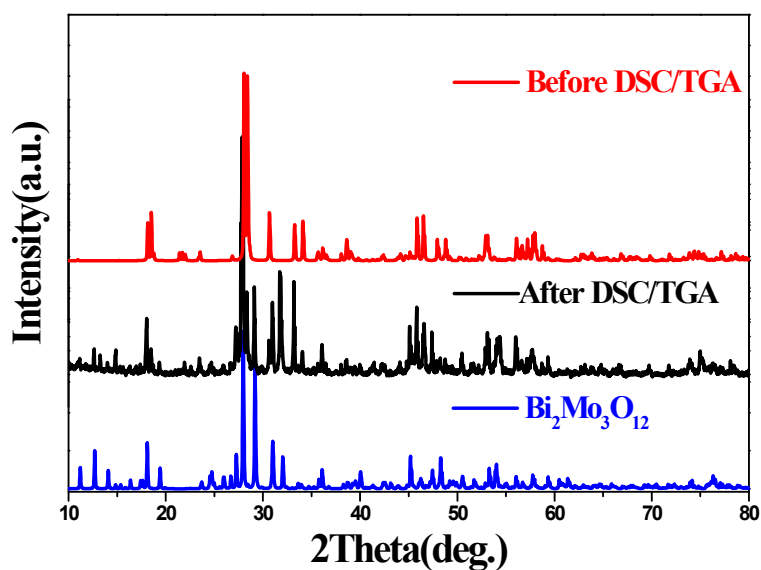

**Figure S1.** The experimental patterns of powder XRD of the residue in the platinum pan after DSC/TGA.

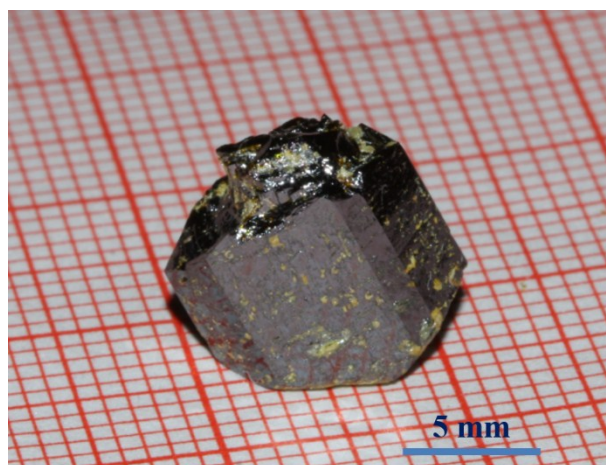

**Figure S2.** Photographs of the as-grown  $\text{Bi}_3\text{FeO}_4(\text{MoO}_4)_2$  crystals through spontaneous crystallization with  $\text{MoO}_3$  flux.

**Table S2.** Bond Distances (Å) and Angles (deg.) for  $\text{Bi}_3\text{FeO}_4(\text{MoO}_4)_2$  crystal.

|                                        |            |                                           |            |
|----------------------------------------|------------|-------------------------------------------|------------|
| Bi2—Bi1 <sup>i</sup>                   | 3.649 (3)  | Bi1—O6 <sup>viii</sup>                    | 2.722 (12) |
| Bi2—O2 <sup>ii</sup>                   | 2.235 (12) | Bi1—O5 <sup>ix</sup>                      | 2.346 (14) |
| Bi2—O2                                 | 2.236 (14) | Bi1—O5 <sup>x</sup>                       | 2.346 (14) |
| Bi2—O1 <sup>iii</sup>                  | 2.257 (14) | Mo1—O3                                    | 1.776 (13) |
| Bi2—O3 <sup>iii</sup>                  | 2.652 (12) | Mo1—O6                                    | 1.758 (13) |
| Bi2—O3                                 | 2.546 (14) | Mo1—O4                                    | 1.775 (14) |
| Bi2—O4 <sup>iv</sup>                   | 2.683 (13) | Mo1—O5                                    | 1.825 (14) |
| Bi2—O5 <sup>v</sup>                    | 2.519 (14) | Fe1—O2 <sup>xi</sup>                      | 1.908 (13) |
| Bi1—O1 <sup>vi</sup>                   | 2.202 (13) | Fe1—O2                                    | 1.908 (13) |
| Bi1—O1                                 | 2.202 (13) | Fe1—O1                                    | 1.920 (14) |
| Bi1—O6 <sup>vii</sup>                  | 2.722 (12) | Fe1—O1 <sup>xi</sup>                      | 1.920 (14) |
| O2—Bi2—Bi1 <sup>i</sup>                | 106.6 (4)  | O1 <sup>vi</sup> —Bi1—O5 <sup>x</sup>     | 77.9 (5)   |
| O2 <sup>ii</sup> —Bi2—Bi1 <sup>i</sup> | 87.5 (4)   | O6 <sup>viii</sup> —Bi1—Bi2 <sup>ii</sup> | 88.2 (3)   |

|                                          |           |                                           |           |
|------------------------------------------|-----------|-------------------------------------------|-----------|
| O2 <sup>ii</sup> —Bi2—O2                 | 77.3 (3)  | O6 <sup>vii</sup> —Bi1—Bi2 <sup>ii</sup>  | 136.4 (3) |
| O2—Bi2—O1 <sup>iii</sup>                 | 80.9 (5)  | O6 <sup>vii</sup> —Bi1—Bi2 <sup>i</sup>   | 88.2 (3)  |
| O2 <sup>ii</sup> —Bi2—O1 <sup>iii</sup>  | 104.1 (5) | O6 <sup>viii</sup> —Bi1—Bi2 <sup>i</sup>  | 136.4 (3) |
| O2 <sup>ii</sup> —Bi2—O3 <sup>iii</sup>  | 137.9 (4) | O6 <sup>vii</sup> —Bi1—O6 <sup>viii</sup> | 124.3 (6) |
| O2—Bi2—O3                                | 80.9 (5)  | O5 <sup>ix</sup> —Bi1—Bi2 <sup>ii</sup>   | 108.6 (3) |
| O2—Bi2—O3 <sup>iii</sup>                 | 76.3 (5)  | O5 <sup>x</sup> —Bi1—Bi2 <sup>i</sup>     | 108.6 (3) |
| O2 <sup>ii</sup> —Bi2—O3                 | 78.6 (5)  | O5 <sup>ix</sup> —Bi1—Bi2 <sup>i</sup>    | 43.2 (3)  |
| O2—Bi2—O4 <sup>iv</sup>                  | 126.1 (4) | O5 <sup>x</sup> —Bi1—Bi2 <sup>ii</sup>    | 43.2 (3)  |
| O2 <sup>ii</sup> —Bi2—O4 <sup>iv</sup>   | 152.9 (5) | O5 <sup>ix</sup> —Bi1—O6 <sup>vii</sup>   | 94.2 (4)  |
| O2 <sup>ii</sup> —Bi2—O5 <sup>v</sup>    | 77.4 (4)  | O5 <sup>x</sup> —Bi1—O6 <sup>viii</sup>   | 94.2 (4)  |
| O2—Bi2—O5 <sup>v</sup>                   | 138.1 (4) | O5 <sup>ix</sup> —Bi1—O6 <sup>viii</sup>  | 100.7 (4) |
| O1 <sup>iii</sup> —Bi2—Bi1 <sup>i</sup>  | 34.6 (3)  | O5 <sup>x</sup> —Bi1—O6 <sup>vii</sup>    | 100.7 (4) |
| O1 <sup>iii</sup> —Bi2—O3                | 160.5 (5) | O5 <sup>x</sup> —Bi1—O5 <sup>ix</sup>     | 147.9 (7) |
| O1 <sup>iii</sup> —Bi2—O3 <sup>iii</sup> | 103.4 (4) | O3—Mo1—O5                                 | 110.5 (6) |
| O1 <sup>iii</sup> —Bi2—O4 <sup>iv</sup>  | 70.7 (4)  | O6—Mo1—O3                                 | 112.6 (6) |
| O1 <sup>iii</sup> —Bi2—O5 <sup>v</sup>   | 73.7 (5)  | O6—Mo1—O4                                 | 107.2 (6) |
| O3—Bi2—Bi1 <sup>i</sup>                  | 162.4 (3) | O6—Mo1—O5                                 | 106.5 (7) |
| O3 <sup>iii</sup> —Bi2—Bi1 <sup>i</sup>  | 131.5 (3) | O4—Mo1—O3                                 | 106.4 (7) |
| O3—Bi2—O3 <sup>iii</sup>                 | 65.2 (3)  | O4—Mo1—O5                                 | 113.8 (7) |
| O3 <sup>iii</sup> —Bi2—O4 <sup>iv</sup>  | 67.5 (4)  | O2 <sup>xi</sup> —Fe1—O2                  | 123.3 (8) |
| O3—Bi2—O4 <sup>iv</sup>                  | 115.4 (4) | O2 <sup>xi</sup> —Fe1—O1 <sup>xi</sup>    | 106.8 (6) |
| O4 <sup>iv</sup> —Bi2—Bi1 <sup>i</sup>   | 73.4 (3)  | O2—Fe1—O1                                 | 106.8 (6) |
| O5 <sup>v</sup> —Bi2—Bi1 <sup>i</sup>    | 39.6 (3)  | O2 <sup>xi</sup> —Fe1—O1                  | 101.9 (5) |
| O5 <sup>v</sup> —Bi2—O3                  | 125.3 (4) | O2—Fe1—O1 <sup>xi</sup>                   | 101.9 (5) |
| O5 <sup>v</sup> —Bi2—O3 <sup>iii</sup>   | 141.5 (4) | O1—Fe1—O1 <sup>xi</sup>                   | 117.2 (8) |

|                                          |           |                                          |           |
|------------------------------------------|-----------|------------------------------------------|-----------|
| O5 <sup>v</sup> —Bi2—O4 <sup>iv</sup>    | 75.7 (4)  | Bi2 <sup>iii</sup> —O2—Bi2               | 113.0 (6) |
| Bi2 <sup>ii</sup> —Bi1—Bi2 <sup>i</sup>  | 84.42 (8) | Fe1—O2—Bi2                               | 122.8 (6) |
| O1 <sup>vi</sup> —Bi1—Bi2 <sup>i</sup>   | 35.6 (4)  | Fe1—O2—Bi2 <sup>iii</sup>                | 123.0 (7) |
| O1—Bi1—Bi2 <sup>ii</sup>                 | 35.6 (4)  | Bi1—O1—Bi2 <sup>ii</sup>                 | 109.8 (6) |
| O1—Bi1—Bi2 <sup>i</sup>                  | 72.7 (4)  | Fe1—O1—Bi2 <sup>ii</sup>                 | 116.1 (6) |
| O1 <sup>vi</sup> —Bi1—Bi2 <sup>ii</sup>  | 72.7 (4)  | Fe1—O1—Bi1                               | 129.9 (7) |
| O1—Bi1—O1 <sup>vi</sup>                  | 82.8 (7)  | Bi2—O3—Bi2 <sup>ii</sup>                 | 91.7 (4)  |
| O1—Bi1—O6 <sup>vii</sup>                 | 159.0 (4) | Mo1—O3—Bi2 <sup>ii</sup>                 | 123.8 (7) |
| O1 <sup>vi</sup> —Bi1—O6 <sup>viii</sup> | 159.0 (4) | Mo1—O3—Bi2                               | 138.5 (6) |
| O1—Bi1—O6 <sup>viii</sup>                | 76.5 (4)  | Mo1—O6—Bi1 <sup>viii</sup>               | 116.8 (6) |
| O1 <sup>vi</sup> —Bi1—O6 <sup>vii</sup>  | 76.5 (4)  | Mo1—O4—Bi2 <sup>xii</sup>                | 127.8 (7) |
| O1—Bi1—O5 <sup>x</sup>                   | 78.2 (5)  | Bi1 <sup>x</sup> —O5—Bi2 <sup>xiii</sup> | 97.1 (5)  |
| O1—Bi1—O5 <sup>ix</sup>                  | 77.9 (5)  | Mo1—O5—Bi2 <sup>xiii</sup>               | 134.3 (7) |
| O1 <sup>vi</sup> —Bi1—O5 <sup>ix</sup>   | 78.2 (5)  | Mo1—O5—Bi1 <sup>x</sup>                  | 127.4 (7) |

Symmetry codes: (i)  $-x+1, -y+1, -z+2$ ; (ii)  $x, -y+1, z+1/2$ ; (iii)  $x, -y+1, z-1/2$ ; (iv)  $-x+1/2, y-1/2, -z+1/2$ ; (v)  $-x+1/2, y-1/2, -z+3/2$ ; (vi)  $-x+1, y, -z+5/2$ ; (vii)  $x+1/2, -y+3/2, z+3/2$ ; (viii)  $-x+1/2, -y+3/2, -z+1$ ; (ix)  $x+1/2, -y+3/2, z+1/2$ ; (x)  $-x+1/2, -y+3/2, -z+2$ ; (xi)  $-x+1, y, -z+3/2$ ; (xii)  $-x+1/2, y+1/2, -z+1/2$ ; (xiii)  $-x+1/2, y+1/2, -z+3/2$ .

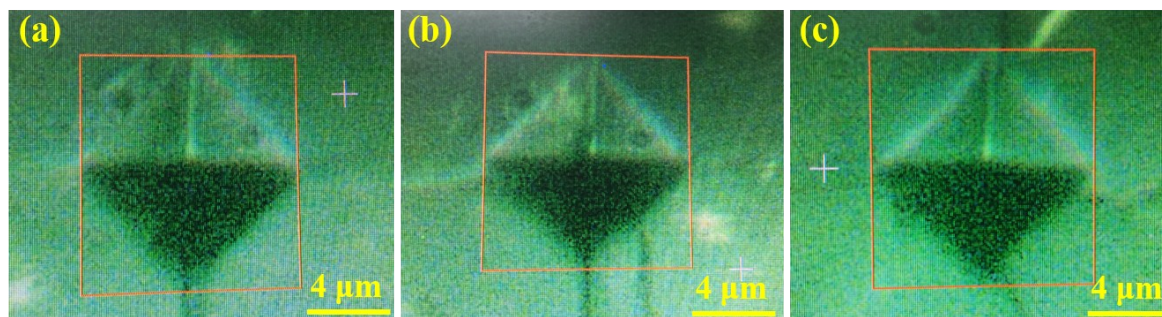

**Figure S3.** (a)-(c) Photographs of the indentation morphologies of the  $\text{Bi}_3\text{FeO}_4(\text{MoO}_4)_2$  crystal faces (100), (010) and (001), respectively, from which they are rhombic and regular.

**Table S3.** Observed Raman wavenumbers ( $\text{cm}^{-1}$ ) and vibrational assignments for the  $\text{Bi}_3\text{FeO}_4(\text{MoO}_4)_2$  crystal.<sup>1-3</sup>

| Raman spectra ( $\text{cm}^{-1}$ ) | Assignments                                         |
|------------------------------------|-----------------------------------------------------|
| < 100 (vw)                         | O-Bi-O and O-Mo-O bond bending                      |
| 124.49 (vs)                        | Bi-O bands and Bi and Mo translation and libration  |
| 200-600 (w)                        | Bi-O bonds, Mo-O bonds and translations of Fe atoms |
| 761.12 (m)                         | Mo-O bonds and Mo-O-Bi bridges                      |
| 868.67 (vs)                        | $\text{MoO}_4$ asymmetric stretching                |
| 870.41 (m)                         | $\text{MoO}_4$ symmetric stretching                 |

In the table, vs: very strong; m: medium; w: weak

### References

1. L. S. Cavalcante, J. C. Sczancoski, L. F. Lima, J. Espinosa, P. S. Pizani, J. A. Varela and E. Longo, *Cryst. Growth Des.* 2009, **9**, 1002– 1012.
2. M. Maczka, A. Majchrowski and I. V. Kityk, *Vib. Spectrosc.* 2013, **64**, 158–163.
3. C. Li, Z. Gao, X. Tian, Q. Wu, F. Liu, X. Du, D. Huang, Y. Sun, D. Cui and X. Tao, *J. Alloy. Comp.*, 2019, **777**, 59-66.
